# Supplementary material for: Microstructural origin of peculiar spectra and excellent luminescence properties of Y10Ta4O25:Eu3+ with a fluorite-related structure
Source: Royal Society of Chemistry journal article supplement (doi:10.1039/d2qi01620f), 2022-01-01
Supplement: d2qi01620f1.pdf [file d2qi01620f1.pdf]

## Supporting Information

### Microstructural origin of peculiar spectra and excellent luminescence properties of $Y_{10}Ta_4O_{25}:Eu^{3+}$ with fluorite-related structure

Donglei Wei,<sup>a,b</sup> Xifeng Yang<sup>\*a</sup>, Yushen Liu,<sup>a</sup> Hyo Jin Seo<sup>\*b</sup>

<sup>1</sup> School of Electronic and Information Engineering, Changshu Institute of Technology, Changshu, 215500, China

<sup>2</sup> Department of Physics, Pukyong National University, Busan 48513, Republic of Korea

### Figures

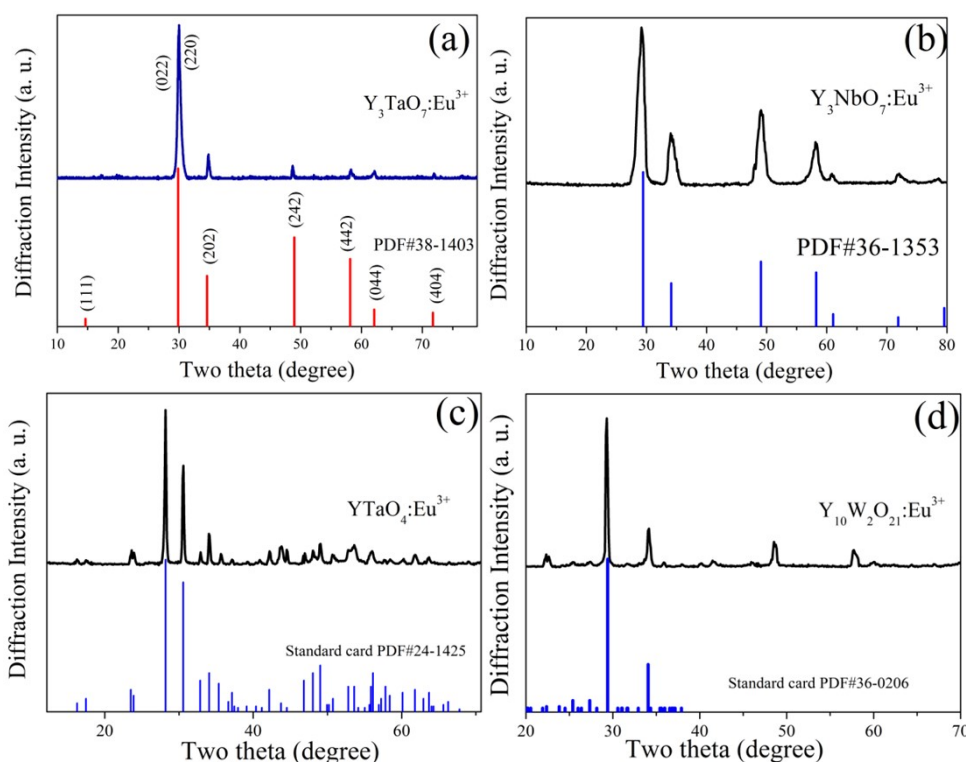

**Figure S-1** XRD patterns of the reference samples of  $Y_3TaO_7:Eu^{3+}$ ,  $Y_3NbO_7:Eu^{3+}$ ,  $YTaO_4:Eu^{3+}$ ,  $Y_{10}W_2O_{21}:Eu^{3+}$  with the fluorite-related structure. The standard cards were compared with the experimental patterns.

\* Corresponding authors: [hjseo@pknu.ac.kr](mailto:hjseo@pknu.ac.kr) (Hyo Jin Seo); [xfy@cslg.edu.cn](mailto:xfy@cslg.edu.cn) (Xifeng Yang); Tel.: +82-51-629 5568; fax: +82-51-62955494.

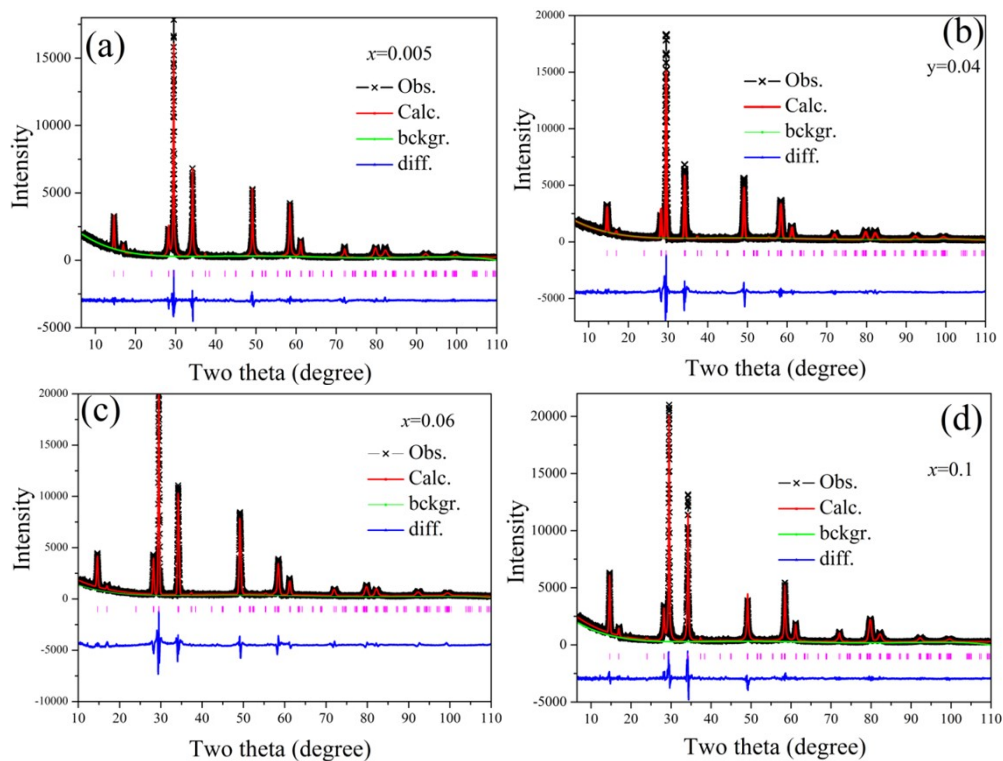

**Figure S-2** the representative Rietveld refinements of  $Y_{10-10x}Eu_{10x}Ta_4O_{25}$  ceramics with  $x=0.005$  (a),  $x=0.04$  (b),  $x=0.06$  (c) and  $x=0.1$  (d).

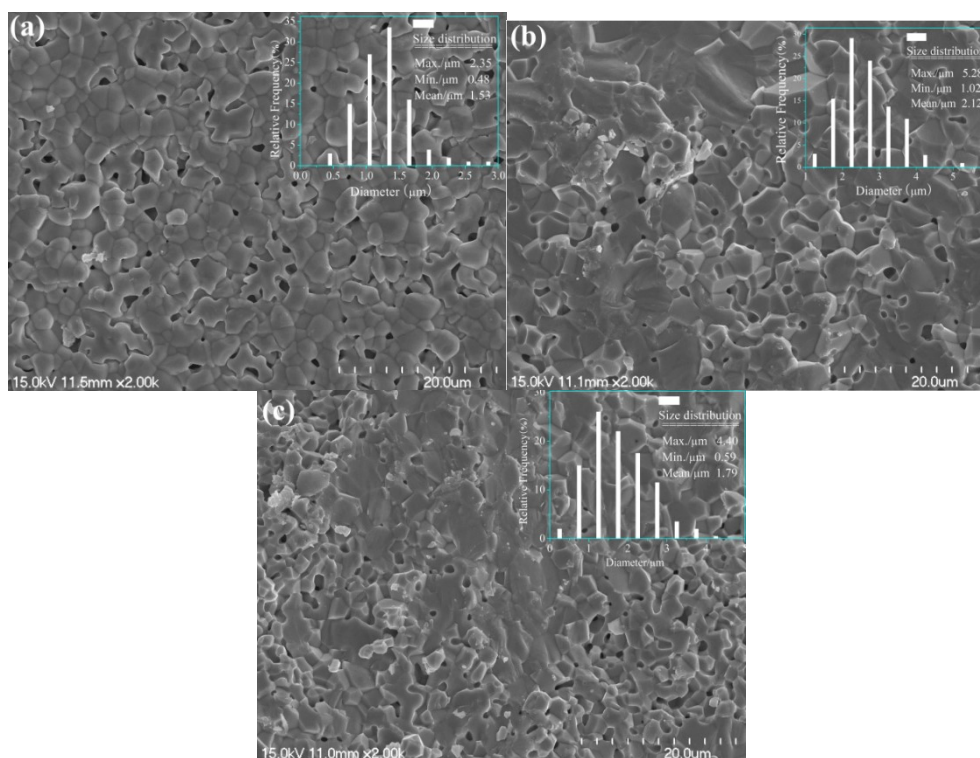

**Figure S-3** the representative SEM pictures and the size distribution of the particles of  $Y_{10-10x}Eu_{10x}Ta_4O_{25}$  ceramic phosphors with  $x=0.005$  (a),  $x=0.04$  (b), and  $x=0.06$  (c).

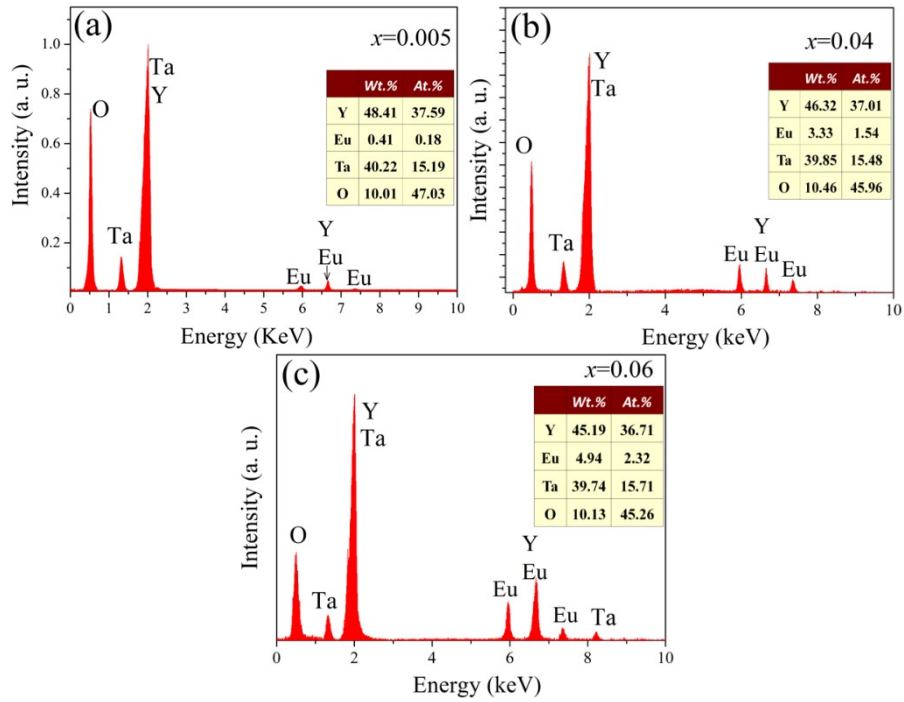

**Figure S-4** the representative EDS spectra and the experimental element ratio of  $Y_{10-10x}Eu_{10x}Ta_4O_{25}$  with  $x=0.005$  (a),  $x=0.04$  (b), and  $x=0.06$  (c).

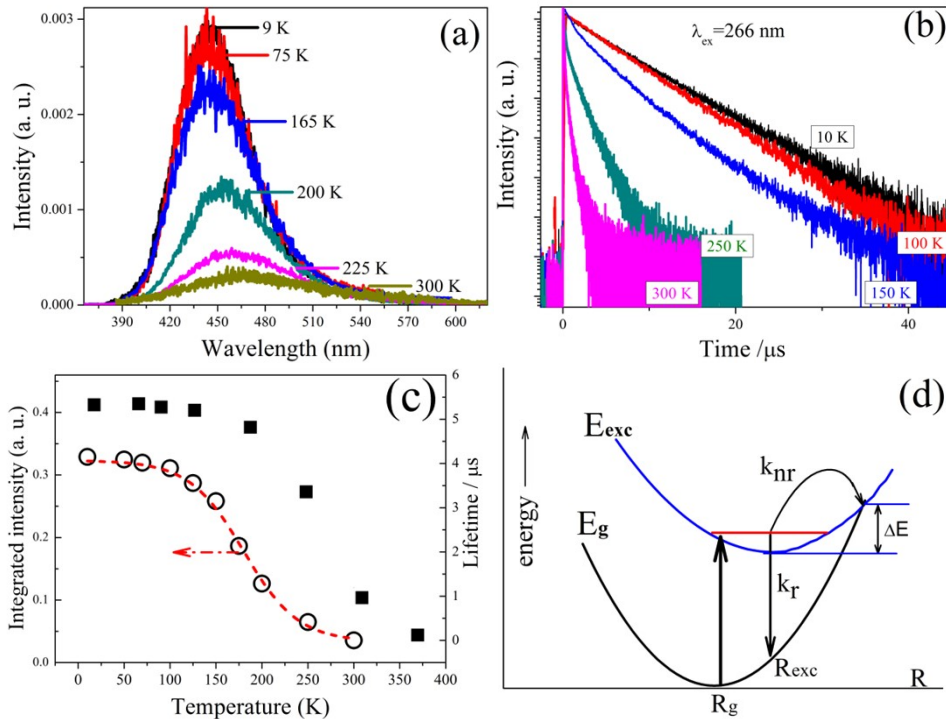

**Figure S-5** The intrinsic emission (a), the decay curves (b), temperature-dependent luminescence (c), and the configuration diagram for the ground state ( $E_g$ ), the excited state ( $E_{exc}$ ), and electronic transitions (d) of pure  $Y_{10}Ta_4O_{25}$  host.  $R_{exc}$  and  $R_g$  are the equilibrium distances off the excited and ground states, respectively. The excitation was pulsed 266 nm Nd:YAG laser.

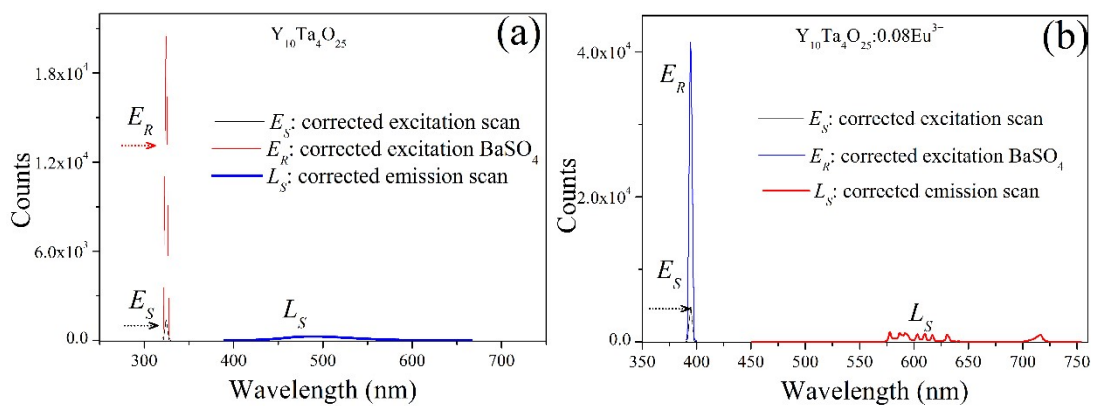

**Figure S-6** The corrected excitation line of BaSO<sub>4</sub> and emission spectra of pure (a) and Eu<sup>3+</sup>-doped Y<sub>10</sub>Ta<sub>4</sub>O<sub>25</sub> (b) obtained by using an integrating sphere;

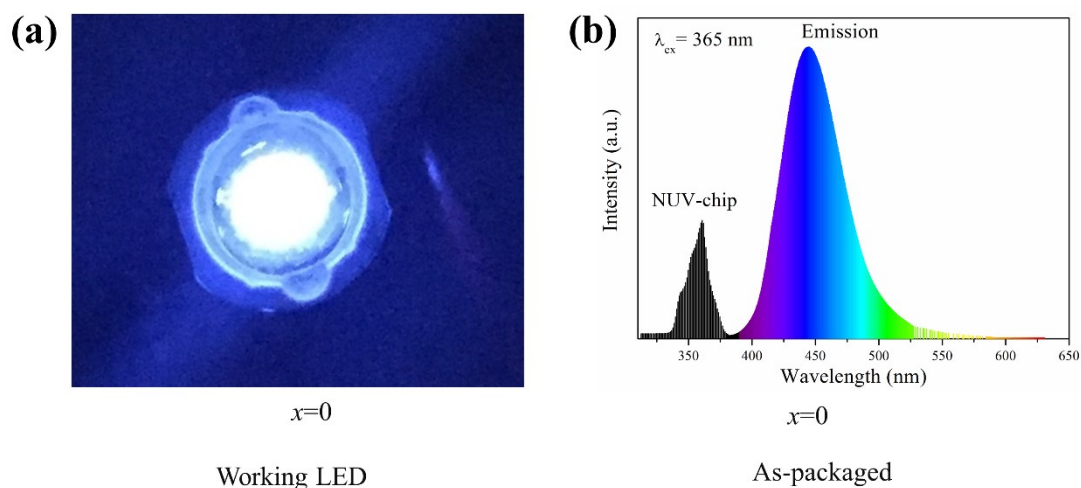

**Figure S-7** The experimental LED lighting devices by combining Y<sub>10</sub>Ta<sub>4</sub>O<sub>25</sub> with 365 nm chip (a), and its electroluminescence spectrum (b).

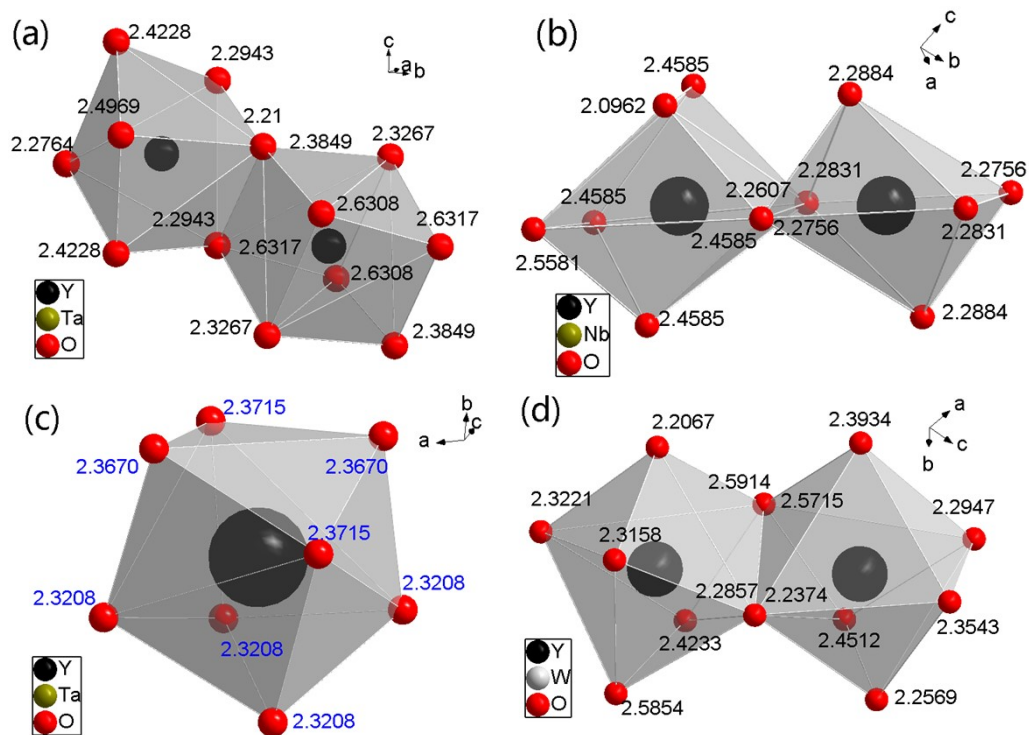

**Figure S-8** The local coordination environments of cation sites Y1 and Y2 in the lattices of  $\text{Y}_3\text{TaO}_7$  (a),  $\text{Y}_3\text{NbO}_7$  (b),  $\text{YTaO}_4$  (c),  $\text{Y}_{10}\text{W}_2\text{O}_{21}$  (d). The structures were downloaded from the data base in <https://materialsproject.org>.

## Tables

**Table S-1** The refined structural parameters of  $Y_{10-10x}Eu_{10x}Ta_4O_{25}$  ( $x=0.005, 0.04, 0.06, 0.1$ ) from the Rietveld refinement using X-ray powder diffraction data taken at room temperature.

| formula          | $x=0.005$         | $x=0.04$          | $x=0.06$          | $x=0.1$           |
|------------------|-------------------|-------------------|-------------------|-------------------|
| radiation        | Cu-K <sub>a</sub> | Cu-K <sub>a</sub> | Cu-K <sub>a</sub> | Cu-K <sub>a</sub> |
| 2 $\theta$ (°)   | 5-110             | 5-110             | 5-110             | 5-110             |
| symmetry         | orthorhombic      | orthorhombic      | orthorhombic      | orthorhombic      |
| space group#     | <i>Cmmm</i> (65)  | <i>Cmmm</i> (65)  | <i>Cmmm</i> (65)  | <i>Cmmm</i> (65)  |
| a/Å              | 10.4851           | 10.5542           | 10.5873           | 10.6733           |
| b/Å              | 7.3615            | 7.3832            | 7.3881            | 7.41615           |
| c/Å              | 3.7327            | 3.7471            | 3.8033            | 3.8565            |
| $\alpha$ /°      | 90                | 90                | 90                | 90                |
| $\beta$ /°       | 90                | 90                | 90                | 90                |
| $\gamma$ /°      | 90                | 90                | 90                | 90                |
| Z                | 2                 | 2                 | 2                 | 2                 |
| R <sub>p</sub>   | 0.0838            | 0.0976            | 0.0908            | 0.08218           |
| R <sub>wp</sub>  | 0.1149            | 0.1156            | 0.1249            | 0.1122            |
| $\chi^2$         | 2.21              | 2.31              | 2.13              | 2.53              |
| V/Å <sup>3</sup> | 288.11782         | 291.98816         | 297.49424         | 305.26046         |

**Table S-2** the Raman mode ( $\text{cm}^{-1}$ ), the average distances of  $\text{Y}_{10}\text{Ta}_4\text{O}_{25}:\text{Eu}^{3+}$  compared with the reference samples of  $\text{Y}_3\text{TaO}_7:\text{Eu}^{3+}$ ,  $\text{Y}_3\text{NbO}_7:\text{Eu}^{3+}$ ,  $\text{YTaO}_4:\text{Eu}^{3+}$ ,  $\text{Y}_{10}\text{W}_2\text{O}_{21}:\text{Eu}^{3+}$ ,  $\text{BaSrMWO}_6$  and  $\text{Bi}_2\text{WO}_6$ .

|                                                        | Raman mode ( $\text{cm}^{-1}$ ) | (Y/Eu)-O distances ( $\text{\AA}$ ) |           | references |
|--------------------------------------------------------|---------------------------------|-------------------------------------|-----------|------------|
|                                                        |                                 | (Y/Eu)1-O                           | (Y/Eu)2-O |            |
| $\text{Y}_{10}\text{Ta}_4\text{O}_{25}:\text{Eu}^{3+}$ | 630                             | 2.0123                              | 2.4182    | This work  |
| $\text{Y}_3\text{TaO}_7:\text{Eu}^{3+}$                | 770                             | 2.3453                              | 2.4933    | [1]        |
| $\text{Y}_3\text{NbO}_7:\text{Eu}^{3+}$                | 783                             | 2.3927                              | 2.2824    | [2]        |
| $\text{YTaO}_4:\text{Eu}^{3+}$                         | 816                             | 2.3434                              |           | [3]        |
| $\text{Y}_{10}\text{W}_2\text{O}_{21}:\text{Eu}^{3+}$  | -                               | 2.39                                | 2.3656    |            |
| $\text{BaSrMWO}_6$                                     | 850                             | -                                   | -         | [4]        |
| $\text{Bi}_2\text{WO}_6$                               | 840                             | -                                   | -         | [5]        |

## References

- [1] L. Chen, P. Wu, P. Song, J. Feng, Synthesis, crystal structure and thermophysical properties of  $(\text{La}_{1-x}\text{Eu}_x)\text{TaO}_7$  ceramics, *Ceramics International* 44(14) (2018) 16273-16281.
- [2] A. Chesnaud, M.D. Braida, S. Estradé, F. Peiró, A. Tarancón, A. Morata, G. Dezanneau, High-temperature anion and proton conduction in  $\text{RE}_3\text{NbO}_7$  (RE=La, Gd, Y, Yb, Lu) compounds, *Journal of the European Ceramic Society* 35(11) (2015) 3051-3061.
- [3] J. Wang, Y. Zhou, X. Chong, R. Zhou, J. Feng, Microstructure and thermal properties of a promising thermal barrier coating:  $\text{YTaO}_4$ , *Ceramics International* 42(12) (2016) 13876-13881.
- [4] A. Ezzahi, B. Manoun, A. Ider, L. Bih, S. Benmokhtar, M. Azrour, M. Azdouz, J.M. Igartua, P. Lazor, X-ray diffraction and Raman spectroscopy studies of  $\text{BaSrMWO}_6$  (M=Ni, Co, Mg) double perovskite oxides, *Journal of Molecular Structure* 985(2) (2011) 339-345.
- [5] M. Mączka, L. Macalik, K. Hermanowicz, L. Kępiński, P. Tomaszewski, Phonon properties of nanosized bismuth layered ferroelectric material— $\text{Bi}_2\text{WO}_6$ , *Journal of Raman Spectroscopy* 41(9) (2010) 1059-1066.
